# Supplementary material for: CD4+ and CD8+ cell counts are significantly correlated with absolute lymphocyte count in hospitalized COVID-19 patients: a retrospective study
Source: PeerJ. 2023 Jun 23;11:e15509. doi: 10.7717/peerj.15509 (PMC10292192; doi:10.7717/peerj.15509)
Supplement: Supplemental Information 2 [file peerj-11-15509-s002.xlsx]

## Sheet: 35 sample data_CD4 CD8
No	Age	Gender	CD4I	CD8I	CD4II	CD8II	∑CD4	∑CD8	Severity	HbI	HbII	HtI	HtII	EryhtrocyteI	EryhtrocyteII	LeukoocyteI	LeukocyteII	LymphocyteI	LymphocyteII	NeutrophilI	NeutrophilII	ALCI	ALCII
1	23	1	3	17	26	172	23	155	1	7.2	7.5	20	24	3	3.07	2.33	3.7	47	29	40	62	1095.1	1073
2	67	2	1089	841	1018	847	-71	6	1	10.9	10.9	32	31	3.68	3.72	5.82	4.82	31	32	57	54	1804.2	1542.4
3	56	1	846	517	221	163	-625	-354	1	8.2	7.8	24	23	3.06	2.82	13.32	7.92	10	23	76	58	1332	1821.6
4	76	1	771	797	817	959	46	162	1	13.8	13.2	40	39	4.46	4.3	12.37	13.61	16	10	74	77	1979.2	1361
5	61	1	372	434	297	120	-75	-214	1	6.6	10	21	28	2.06	3.2	4.58	5.77	25	15	55	75	1145	865.5
6	47	1	473	340	825	595	352	255	1	11.9	11.4	37	34	4.4	4.3	13.44	11.09	10	11	84	77	1344	1219.9
7	34	1	213	137	478	225	265	88	1	11.2	9.1	35	29	4.88	3.87	18.11	7.59	5	13	88	74	905.5	986.7
8	62	2	238	291	353	485	115	194	1	11.1	11.3	35	33	3.77	3.77	4.05	3.92	26	33	66	59	1053	1293.6
9	71	2	734	265	879	345	145	80	1	8.3	8.4	27	26	2.98	3	5.79	5.53	29	35	54	48	1679.1	1935.5
10	69	1	1176	412	1064	422	-112	10	1	7.8	10.2	26	33	24	22	7.29	7.57	24	22	61	65	1749.6	1665.4
11	49	2	435	379	1226	704	791	325	1	10.9	10.2	38	35	5.42	5.09	9.48	8.38	13	17	74	70	1232.4	1424.6
12	56	2	1046	842	916	779	-130	-63	1	5.4	6.2	17	20	1.89	2.17	20.47	26.07	10	7	85	90	2047	1824.9
13	65	1	738	1143	441	676	-297	-467	1	13.3	10.8	40	32	4.56	3.68	9.74	11.78	13	9	70	75	1266.2	1060.2
14	46	2	350	319	399	255	44	-64	1	11.3	13.3	33	38	3.99	4.67	17.96	13.54	4	4	94	93	718.4	541.6
15	19	1	2810	1361	2103	947	-707	-414	1	10.9	12.1	31	37	3.71	4.12	5.89	10.72	49	51	40	37	2886.1	5467.2
16	65	1	416	321	449	392	33	71	2	10.7	8.8	32	26	3.76	3.08	5.91	9.17	15	10	73	84	886.5	917
17	63	1	343	136	210	127	-133	-9	2	12.9	12.7	37	37	4.24	4.17	6.77	10.71	8	13	79	74	541.6	1392.3
18	45	2	794	219	3	6	-794	-213	2	11.5	8.6	32	23	5.38	4.05	26.93	19.1	17	13	70	78	4578.1	2483
19	55	2	664	687	312	443	-352	-244	2	10.3	8.8	33	27	3.7	3.08	7.99	12.03	17	7	72	80	1358.3	842.1
20	60	2	909	791	731	566	-178	-225	2	7.3	9.6	22	28	2.54	3.36	7.51	7.56	23	17	57	65	1727.3	1285.2
21	27	2	228	279	214	191	-14	88	2	8.7	10.7	27	33	3.01	3.74	21.43	11.45	3	7	90	83	642.9	801.5
22	78	1	345	204	91	165	-254	-39	2	13.5	11.8	42	36	4.66	4.13	8.88	19.46	6	3	78	93	532.8	583.8
23	54	2	306	163	473	209	167	46	2	10	8.5	31	27	3.59	3.11	20.44	10.92	5	9	93	84	1022	982.8
24	29	2	528	685	235	401	-293	-284	2	8.4	10.6	28	36	3.53	4.55	15.28	17.46	8	8	90	89	1222.4	1396.8
25	31	1	30	146	25	109	-5	-35	2	9.3	8.3	27	26	3.11	2.79	21.82	16.3	1	2	95	95	218.2	326
26	50	1	606	261	433	202	-173	-59	2	11.4	7.5	33	22	4.01	2.56	16	13.65	12	2	82	88	1920	273
27	75	1	183	103	180	67	-3	-36	2	12.1	11.2	37	36	4.12	3.85	11.9	21.13	9	3	81	95	1071	633.9
28	59	1	308	141	10	12	-298	-129	2	8.6	7.8	25	22	2.93	2.73	11.87	26.1	4	1	93	94	474.8	261
29	49	1	157	132	160	149	3	17	2	12.6	13.5	38	38	4.41	4.67	16	17.33	4	6	93	91	640	1039.8
30	32	2	260	303	342	346	-18	43	2	13	12.2	39	35	4.43	4.15	11.4	10.47	7	9	90	86	798	942.3
31	51	1	390	241	157	104	-235	-137	2	10.7	11.1	31	32	3.7	3.81	17.59	11.81	6	7	89	88	1055.4	826.7
32	48	2	10	110	779	468	769	358	2	5.2	6.6	15	20	1.95	2.48	12.85	16.33	14	8	81	89	1799	1306.4
33	71	1	5	70	128	468	123	398	2	10.7	10.6	28	28	3.22	3.22	27.94	8	4	12	92	86	1117.6	960
34	41	1	207	136	134	110	-73	-26	2	7.4	9.9	24	33	2.61	3.53	5.2	7.48	6	5	89	92	312	374
35	60	1	135	134	4	8	-131	-126	2	8.5	9.9	27	29	2.98	3.56	20.38	10.35	5	3	90	91	1019	310.5
#NULL!	#NULL!	#NULL!	#NULL!	#NULL!	#NULL!	#NULL!	#NULL!	#NULL!	#NULL!	#NULL!	#NULL!	#NULL!	#NULL!	#NULL!	#NULL!	#NULL!	#NULL!	#NULL!	#NULL!	#NULL!	#NULL!	#NULL!	#NULL!
#NULL!	#NULL!	#NULL!	#NULL!	#NULL!	#NULL!	#NULL!	#NULL!	#NULL!	#NULL!	#NULL!	#NULL!	#NULL!	#NULL!	#NULL!	#NULL!	#NULL!	#NULL!	#NULL!	#NULL!	#NULL!	#NULL!	#NULL!	#NULL!
#NULL!	#NULL!	#NULL!	#NULL!	#NULL!	#NULL!	#NULL!	#NULL!	#NULL!	#NULL!	#NULL!	#NULL!	#NULL!	#NULL!	#NULL!	#NULL!	#NULL!	#NULL!	#NULL!	#NULL!	#NULL!	#NULL!	#NULL!	#NULL!
#NULL!	#NULL!	#NULL!	#NULL!	#NULL!	#NULL!	#NULL!	#NULL!	#NULL!	#NULL!	#NULL!	#NULL!	#NULL!	#NULL!	#NULL!	#NULL!	#NULL!	#NULL!	#NULL!	#NULL!	#NULL!	#NULL!	#NULL!	#NULL!
#NULL!	#NULL!	#NULL!	#NULL!	#NULL!	#NULL!	#NULL!	#NULL!	#NULL!	#NULL!	#NULL!	#NULL!	#NULL!	#NULL!	#NULL!	#NULL!	#NULL!	#NULL!	#NULL!	#NULL!	#NULL!	#NULL!	#NULL!	#NULL!
#NULL!	#NULL!	#NULL!	#NULL!	#NULL!	#NULL!	#NULL!	#NULL!	#NULL!	#NULL!	#NULL!	#NULL!	#NULL!	#NULL!	#NULL!	#NULL!	#NULL!	#NULL!	#NULL!	#NULL!	#NULL!	#NULL!	#NULL!	#NULL!
#NULL!	#NULL!	#NULL!	#NULL!	#NULL!	#NULL!	#NULL!	#NULL!	#NULL!	#NULL!	#NULL!	#NULL!	#NULL!	#NULL!	#NULL!	#NULL!	#NULL!	#NULL!	#NULL!	#NULL!	#NULL!	#NULL!	#NULL!	#NULL!
#NULL!	#NULL!	#NULL!	#NULL!	#NULL!	#NULL!	#NULL!	#NULL!	#NULL!	#NULL!	#NULL!	#NULL!	#NULL!	#NULL!	#NULL!	#NULL!	#NULL!	#NULL!	#NULL!	#NULL!	#NULL!	#NULL!	#NULL!	#NULL!
#NULL!	#NULL!	#NULL!	#NULL!	#NULL!	#NULL!	#NULL!	#NULL!	#NULL!	#NULL!	#NULL!	#NULL!	#NULL!	#NULL!	#NULL!	#NULL!	#NULL!	#NULL!	#NULL!	#NULL!	#NULL!	#NULL!	#NULL!	#NULL!
#NULL!	#NULL!	#NULL!	#NULL!	#NULL!	#NULL!	#NULL!	#NULL!	#NULL!	#NULL!	#NULL!	#NULL!	#NULL!	#NULL!	#NULL!	#NULL!	#NULL!	#NULL!	#NULL!	#NULL!	#NULL!	#NULL!	#NULL!	#NULL!
#NULL!	#NULL!	#NULL!	#NULL!	#NULL!	#NULL!	#NULL!	#NULL!	#NULL!	#NULL!	#NULL!	#NULL!	#NULL!	#NULL!	#NULL!	#NULL!	#NULL!	#NULL!	#NULL!	#NULL!	#NULL!	#NULL!	#NULL!	#NULL!
#NULL!	#NULL!	#NULL!	#NULL!	#NULL!	#NULL!	#NULL!	#NULL!	#NULL!	#NULL!	#NULL!	#NULL!	#NULL!	#NULL!	#NULL!	#NULL!	#NULL!	#NULL!	#NULL!	#NULL!	#NULL!	#NULL!	#NULL!	#NULL!
#NULL!	#NULL!	#NULL!	#NULL!	#NULL!	#NULL!	#NULL!	#NULL!	#NULL!	#NULL!	#NULL!	#NULL!	#NULL!	#NULL!	#NULL!	#NULL!	#NULL!	#NULL!	#NULL!	#NULL!	#NULL!	#NULL!	#NULL!	#NULL!
#NULL!	#NULL!	#NULL!	#NULL!	#NULL!	#NULL!	#NULL!	#NULL!	#NULL!	#NULL!	#NULL!	#NULL!	#NULL!	#NULL!	#NULL!	#NULL!	#NULL!	#NULL!	#NULL!	#NULL!	#NULL!	#NULL!	#NULL!	#NULL!
#NULL!	#NULL!	#NULL!	#NULL!	#NULL!	#NULL!	#NULL!	#NULL!	#NULL!	#NULL!	#NULL!	#NULL!	#NULL!	#NULL!	#NULL!	#NULL!	#NULL!	#NULL!	#NULL!	#NULL!	#NULL!	#NULL!	#NULL!	#NULL!
#NULL!	#NULL!	#NULL!	#NULL!	#NULL!	#NULL!	#NULL!	#NULL!	#NULL!	#NULL!	#NULL!	#NULL!	#NULL!	#NULL!	#NULL!	#NULL!	#NULL!	#NULL!	#NULL!	#NULL!	#NULL!	#NULL!	#NULL!	#NULL!
#NULL!	#NULL!	#NULL!	#NULL!	#NULL!	#NULL!	#NULL!	#NULL!	#NULL!	#NULL!	#NULL!	#NULL!	#NULL!	#NULL!	#NULL!	#NULL!	#NULL!	#NULL!	#NULL!	#NULL!	#NULL!	#NULL!	#NULL!	#NULL!
#NULL!	#NULL!	#NULL!	#NULL!	#NULL!	#NULL!	#NULL!	#NULL!	#NULL!	#NULL!	#NULL!	#NULL!	#NULL!	#NULL!	#NULL!	#NULL!	#NULL!	#NULL!	#NULL!	#NULL!	#NULL!	#NULL!	#NULL!	#NULL!
#NULL!	#NULL!	#NULL!	#NULL!	#NULL!	#NULL!	#NULL!	#NULL!	#NULL!	#NULL!	#NULL!	#NULL!	#NULL!	#NULL!	#NULL!	#NULL!	#NULL!	#NULL!	#NULL!	#NULL!	#NULL!	#NULL!	#NULL!	#NULL!
#NULL!	#NULL!	#NULL!	#NULL!	#NULL!	#NULL!	#NULL!	#NULL!	#NULL!	#NULL!	#NULL!	#NULL!	#NULL!	#NULL!	#NULL!	#NULL!	#NULL!	#NULL!	#NULL!	#NULL!	#NULL!	#NULL!	#NULL!	#NULL!
#NULL!	#NULL!	#NULL!	#NULL!	#NULL!	#NULL!	#NULL!	#NULL!	#NULL!	#NULL!	#NULL!	#NULL!	#NULL!	#NULL!	#NULL!	#NULL!	#NULL!	#NULL!	#NULL!	#NULL!	#NULL!	#NULL!	#NULL!	#NULL!
#NULL!	#NULL!	#NULL!	#NULL!	#NULL!	#NULL!	#NULL!	#NULL!	#NULL!	#NULL!	#NULL!	#NULL!	#NULL!	#NULL!	#NULL!	#NULL!	#NULL!	#NULL!	#NULL!	#NULL!	#NULL!	#NULL!	#NULL!	#NULL!
#NULL!	#NULL!	#NULL!	#NULL!	#NULL!	#NULL!	#NULL!	#NULL!	#NULL!	#NULL!	#NULL!	#NULL!	#NULL!	#NULL!	#NULL!	#NULL!	#NULL!	#NULL!	#NULL!	#NULL!	#NULL!	#NULL!	#NULL!	#NULL!
#NULL!	#NULL!	#NULL!	#NULL!	#NULL!	#NULL!	#NULL!	#NULL!	#NULL!	#NULL!	#NULL!	#NULL!	#NULL!	#NULL!	#NULL!	#NULL!	#NULL!	#NULL!	#NULL!	#NULL!	#NULL!	#NULL!	#NULL!	#NULL!
#NULL!	#NULL!	#NULL!	#NULL!	#NULL!	#NULL!	#NULL!	#NULL!	#NULL!	#NULL!	#NULL!	#NULL!	#NULL!	#NULL!	#NULL!	#NULL!	#NULL!	#NULL!	#NULL!	#NULL!	#NULL!	#NULL!	#NULL!	#NULL!
#NULL!	#NULL!	#NULL!	#NULL!	#NULL!	#NULL!	#NULL!	#NULL!	#NULL!	#NULL!	#NULL!	#NULL!	#NULL!	#NULL!	#NULL!	#NULL!	#NULL!	#NULL!	#NULL!	#NULL!	#NULL!	#NULL!	#NULL!	#NULL!
#NULL!	#NULL!	#NULL!	#NULL!	#NULL!	#NULL!	#NULL!	#NULL!	#NULL!	#NULL!	#NULL!	#NULL!	#NULL!	#NULL!	#NULL!	#NULL!	#NULL!	#NULL!	#NULL!	#NULL!	#NULL!	#NULL!	#NULL!	#NULL!
#NULL!	#NULL!	#NULL!	#NULL!	#NULL!	#NULL!	#NULL!	#NULL!	#NULL!	#NULL!	#NULL!	#NULL!	#NULL!	#NULL!	#NULL!	#NULL!	#NULL!	#NULL!	#NULL!	#NULL!	#NULL!	#NULL!	#NULL!	#NULL!
#NULL!	#NULL!	#NULL!	#NULL!	#NULL!	#NULL!	#NULL!	#NULL!	#NULL!	#NULL!	#NULL!	#NULL!	#NULL!	#NULL!	#NULL!	#NULL!	#NULL!	#NULL!	#NULL!	#NULL!	#NULL!	#NULL!	#NULL!	#NULL!
#NULL!	#NULL!	#NULL!	#NULL!	#NULL!	#NULL!	#NULL!	#NULL!	#NULL!	#NULL!	#NULL!	#NULL!	#NULL!	#NULL!	#NULL!	#NULL!	#NULL!	#NULL!	#NULL!	#NULL!	#NULL!	#NULL!	#NULL!	#NULL!
#NULL!	#NULL!	#NULL!	#NULL!	#NULL!	#NULL!	#NULL!	#NULL!	#NULL!	#NULL!	#NULL!	#NULL!	#NULL!	#NULL!	#NULL!	#NULL!	#NULL!	#NULL!	#NULL!	#NULL!	#NULL!	#NULL!	#NULL!	#NULL!
#NULL!	#NULL!	#NULL!	#NULL!	#NULL!	#NULL!	#NULL!	#NULL!	#NULL!	#NULL!	#NULL!	#NULL!	#NULL!	#NULL!	#NULL!	#NULL!	#NULL!	#NULL!	#NULL!	#NULL!	#NULL!	#NULL!	#NULL!	#NULL!
#NULL!	#NULL!	#NULL!	#NULL!	#NULL!	#NULL!	#NULL!	#NULL!	#NULL!	#NULL!	#NULL!	#NULL!	#NULL!	#NULL!	#NULL!	#NULL!	#NULL!	#NULL!	#NULL!	#NULL!	#NULL!	#NULL!	#NULL!	#NULL!
#NULL!	#NULL!	#NULL!	#NULL!	#NULL!	#NULL!	#NULL!	#NULL!	#NULL!	#NULL!	#NULL!	#NULL!	#NULL!	#NULL!	#NULL!	#NULL!	#NULL!	#NULL!	#NULL!	#NULL!	#NULL!	#NULL!	#NULL!	#NULL!
#NULL!	#NULL!	#NULL!	#NULL!	#NULL!	#NULL!	#NULL!	#NULL!	#NULL!	#NULL!	#NULL!	#NULL!	#NULL!	#NULL!	#NULL!	#NULL!	#NULL!	#NULL!	#NULL!	#NULL!	#NULL!	#NULL!	#NULL!	#NULL!
